# Supplementary material
Source: PubMed Central journal article supplement (PMC5487290)
Supplement: NIHMS842735-supplement-Supplemental_Digital_Content.pdf [file NIHMS842735-supplement-Supplemental_Digital_Content.pdf]

Supplemental Digital Table 1

**Quality Reporting of the 22 Quantitative Studies According to the Medical Education Research Study Quality Instrument (MERSQI)<sup>a</sup>**

| First author, study year          | Study design                      | Sampling: No. of institutions | Sampling: Response rate | Type of data                        | Validity: Internal structure | Validity: Content | Validity: Relationship to variables | Data analysis: Appropriateness | Data analysis: Complexity     | Outcomes                 | Score |
|-----------------------------------|-----------------------------------|-------------------------------|-------------------------|-------------------------------------|------------------------------|-------------------|-------------------------------------|--------------------------------|-------------------------------|--------------------------|-------|
| Bergl, 2015 <sup>11</sup>         | single group, cross-sectional (1) | 1 institution (0.5)           | 64.2% (1)               | assessment by study participant (1) | reported (1)                 | reported (1)      | not reported (0)                    | appropriate (1)                | descriptive analysis only (1) | behaviors (2)            | 9.5   |
| Ben-Yakov, 2015 <sup>30</sup>     | single group (1)                  | 1 institution (0.5)           | 49.1% (0.5)             | assessment by study participant (1) | reported (1)                 | reported (1)      | not reported (0)                    | appropriate (1)                | beyond descriptive (2)        | behaviors (2)            | 10    |
| Bensalem-Owen, 2011 <sup>12</sup> | single group, pre/post (1.5)      | 1 institution (0.5)           | 100% (1.5)              | objective (3)                       | reported (1)                 | reported (1)      | reported (1)                        | appropriate (1)                | descriptive analysis only (1) | knowledge, skills (1.5)  | 13    |
| Bogoch, 2012 <sup>13</sup>        | single group, cross-sectional (1) | 2 institutions (1)            | 58% (1)                 | assessment by study participant (1) | reported (1)                 | reported (1)      | not reported (0)                    | appropriate (1)                | descriptive analysis only (1) | behaviors (2)            | 10    |
| Cook, 2013 <sup>31</sup>          | single group, cross-sectional (1) | 1 institution (0.5)           | 61% (1)                 | assessment by study participant (1) | reported (1)                 | reported (1)      | not reported (0)                    | appropriate (1)                | descriptive analysis only (1) | attitude/perceptions (1) | 8.5   |
| Deloney, 2012 <sup>24</sup>       | single group, cross-sectional (1) | 1 institution (0.5)           | 47% (0.5)               | assessment by study participant (1) | reported (1)                 | reported (1)      | not reported (0)                    | appropriate (1)                | descriptive analysis only (1) | attitude/perceptions (1) | 8     |
| Desai, 2014 <sup>14</sup>         | single group, cross-sectional (1) | 1 institution (0.5)           | 100% (1.5)              | objective (3)                       | reported (1)                 | reported (1)      | reported (1)                        | appropriate (1)                | beyond descriptive (2)        | behaviors (2)            | 14    |

|                                |                                   |                        |                 |                                     |              |                  |                  |                   |                               |                          |     |
|--------------------------------|-----------------------------------|------------------------|-----------------|-------------------------------------|--------------|------------------|------------------|-------------------|-------------------------------|--------------------------|-----|
| Fischer, 2013 <sup>15</sup>    | single group, cross-sectional (1) | > 2 institutions (1.5) | N/A             | objective (3)                       | reported (1) | reported (1)     | not reported (0) | appropriate (1)   | beyond descriptive (2)        | knowledge, skills (1.5)  | 12  |
| George, 2014 <sup>25</sup>     | single group, cross-sectional (1) | > 2 institutions (1.5) | 30% (0.5)       | assessment by study participant (1) | reported (1) | reported (1)     | not reported (0) | appropriate (1)   | descriptive analysis only (1) | attitude/perceptions (1) | 9   |
| Ginory, 2012 <sup>32</sup>     | single group, cross-sectional (1) | > 2 institutions (1.5) | < 50% (0.5)     | assessment by study participant (1) | reported (1) | reported (1)     | not reported (0) | appropriate (1)   | descriptive analysis only (1) | attitude/perceptions (1) | 9   |
| Go, 2012 <sup>26</sup>         | single group, cross-sectional (1) | > 2 institutions (1.5) | 39% (0.5)       | assessment by study participant (1) | reported (1) | reported (1)     | not reported (0) | appropriate (1)   | descriptive analysis only (1) | attitude/perceptions (1) | 9   |
| Go, 2012 <sup>27</sup>         | non-randomized 2 group (2)        | 2 institutions (1)     | 46.3% PDs (0.5) | assessment by study participant (1) | reported (1) | not reported (0) | not reported (0) | inappropriate (0) | descriptive analysis only (1) | attitude/perceptions (1) | 7.5 |
| Golden, 2012 <sup>28</sup>     | single group (1)                  | 1 institution (0.5)    | N/A             | objective (3)                       | reported (1) | not reported (0) | not reported (0) | appropriate (1)   | descriptive analysis only (1) | attitude/perceptions (1) | 8.5 |
| Jent, 2011 <sup>33</sup>       | single group (1)                  | 1 institution (0.5)    | 85% (1.5)       | assessment by study participant (1) | reported (1) | not reported (0) | not reported (0) | appropriate (1)   | descriptive analysis only (1) | attitude/perceptions (1) | 8   |
| Karimkhani, 2015 <sup>17</sup> | single group, pre/post (1.5)      | 1 institution (0.5)    | 100% (1.5)      | assessment by study participant (1) | reported (1) | not reported (0) | not reported (0) | inappropriate (0) | descriptive analysis only (1) | attitude/perceptions (1) | 7.5 |
| Kohli, 2011 <sup>18</sup>      | single group (1)                  | 1 institution (0.5)    | 85% (1.5)       | assessment by study participant (1) | reported (1) | not reported (0) | not reported (0) | appropriate (1)   | descriptive analysis only (1) | attitude/perceptions (1) | 8   |
| Langenau, 2014 <sup>19</sup>   | single group, cross-              | > 2 institutions (1.5) | < 50% (0.5)     | assessment by study participant     | reported (1) | reported (1)     | not reported (0) | appropriate (1)   | descriptive analysis only (1) | attitude/perceptions (1) | 9   |

|                                  |                                   |                        |                                                                                             |                                                 |                  |                  |                  |                 |                                 |                                          |      |
|----------------------------------|-----------------------------------|------------------------|---------------------------------------------------------------------------------------------|-------------------------------------------------|------------------|------------------|------------------|-----------------|---------------------------------|------------------------------------------|------|
|                                  | sectional (1)                     |                        | (1)                                                                                         |                                                 |                  |                  |                  |                 |                                 |                                          |      |
| Matava, 2013 <sup>20</sup>       | single group, cross-sectional (1) | > 2 institutions (1.5) | 24% (0.5)                                                                                   | assessment by study participant (1)             | reported (1)     | reported (1)     | not reported (0) | appropriate (1) | descriptive analysis only (1)   | attitude/perceptions (1)                 | 9    |
| Moubarak, 2011 <sup>36</sup>     | single group, cross-sectional (1) | 1 institution (0.5)    | 50% (1)                                                                                     | assessment by study participant (1)             | reported (1)     | reported (1)     | not reported (0) | appropriate (1) | descriptive analysis only (1)   | attitude/perceptions (1)                 | 8.5  |
| Schulman, 2013 <sup>38</sup>     | single group (1)                  | > 2 institution (1.5)  | 11.9% (0.5)                                                                                 | assessment by study participant (1)             | reported (1)     | not reported (0) | not reported (0) | appropriate (1) | descriptive analysis (1)        | attitude/perceptions (1)                 | 8    |
| Schweitzer, 2012 <sup>29</sup>   | single group, cross-sectional (1) | > 2 institution (1.5)  | 10.0% (0.5)                                                                                 | objective (3)                                   | not reported (0) | not reported (0) | not reported (0) | appropriate (1) | descriptive analysis only (1)   | behaviors (2)                            | 10   |
| Vasilopoulos, 2015 <sup>23</sup> | single group, pre/post test (1.5) | 1 institution (0.5)    | N/A 33 participants but authors do not mention how many were initially asked to participate | assessment by participant (1) AND objective (3) | reported (1)     | reported (1)     | reported (1)     | appropriate (1) | beyond descriptive analysis (3) | attitude/perceptions AND knowledge (2.5) | 14.5 |

Abbreviation: PD indicates program directors and N/A indicates not applicable.

<sup>a</sup> Points obtained are in the parentheses in each cell. The mean MERSQI score for all 22 quantitative studies was 9.6.

Supplemental Digital Table 2

**Quality Reporting of the 7 Qualitative Studies According to Consolidated Criteria for Reporting Qualitative Research (COREQ) Criteria<sup>a</sup>**

| Criteria                                                                              | No. of studies that reported criterion (%) | Jalali <sup>16</sup> | Shaughnessy <sup>21</sup> | Sherbino <sup>22</sup> | Landman <sup>34</sup> | Langenfeld <sup>35</sup> | Ponce <sup>37</sup> | Thompson <sup>39</sup> |
|---------------------------------------------------------------------------------------|--------------------------------------------|----------------------|---------------------------|------------------------|-----------------------|--------------------------|---------------------|------------------------|
| <b>Personal Characteristics</b>                                                       |                                            |                      |                           |                        |                       |                          |                     |                        |
| Interviewer or facilitator identified                                                 | 100                                        | x                    | x                         | x                      | x                     | x                        | x                   | x                      |
| Credentials                                                                           | 100                                        | x                    | x                         | x                      | x                     | x                        | x                   | x                      |
| Occupation                                                                            | 100                                        | x                    | x                         | x                      | x                     | x                        | x                   | x                      |
| Sex                                                                                   | 100                                        | x                    | x                         | x                      | x                     | x                        | x                   | x                      |
| Experience and training                                                               | 100                                        | x                    | x                         | x                      | x                     | x                        | x                   | x                      |
| <b>Relationship with participants</b>                                                 |                                            |                      |                           |                        |                       |                          |                     |                        |
| Relationship established before study                                                 | 57.1                                       | -                    | x                         | x                      | x                     | -                        | x                   | -                      |
| Participant knowledge of the interviewer                                              | 57.1                                       | -                    | x                         | x                      | x                     | -                        | x                   | -                      |
| Interviewer characteristics                                                           | 85.7                                       | -                    | x                         | x                      | x                     | x                        | x                   | x                      |
| <b>Theoretical Framework (i.e., methodological orientation and theory identified)</b> |                                            |                      |                           |                        |                       |                          |                     |                        |
| <b>Participant selection</b>                                                          |                                            |                      |                           |                        |                       |                          |                     |                        |
| Sampling                                                                              | 100                                        | x                    | x                         | x                      | x                     | x                        | x                   | x                      |
| Method of approach                                                                    | 100                                        | x                    | x                         | x                      | x                     | x                        | x                   | x                      |
| Sample Size                                                                           | 100                                        | x                    | x                         | x                      | x                     | x                        | x                   | x                      |
| Nonparticipation (number or justification)                                            | 28.6                                       | -                    | -                         | -                      | x                     | -                        | x                   | -                      |
| <b>Setting</b>                                                                        |                                            |                      |                           |                        |                       |                          |                     |                        |
| Setting of data collection                                                            | 100                                        | x                    | x                         | x                      | x                     | x                        | x                   | x                      |
| Presence of nonparticipants                                                           | 42.9                                       | -                    | x                         | -                      | x                     | x                        | -                   | -                      |

|                                                                              |      |    |    |    |    |    |    |    |
|------------------------------------------------------------------------------|------|----|----|----|----|----|----|----|
| Description of sample                                                        | 100  | x  | x  | x  | x  | x  | x  | x  |
| <b>Data Collection</b>                                                       |      |    |    |    |    |    |    |    |
| Interview guide                                                              | 100  | x  | x  | x  | x  | x  | x  | x  |
| Repeat interviews                                                            | 0    | -  | -  | -  | -  | -  | -  | -  |
| Audio or visual recording                                                    | 28.6 | -  | x  | x  | -  | -  | -  | -  |
| Field Notes                                                                  | 28.6 | -  | x  | x  | -  | -  | -  | -  |
| Duration                                                                     | 14.3 | -  | x  | -  | -  | -  | -  | -  |
| Data Saturation                                                              | 100  | x  | x  | x  | x  | x  | x  | x  |
| Transcripts returned to participants                                         | 14.3 | -  | -  | x  | -  | -  | -  | -  |
| <b>Data Analysis</b>                                                         |      |    |    |    |    |    |    |    |
| Number of data coders                                                        | 100  | x  | x  | x  | x  | x  | x  | x  |
| Description of the coding tree                                               | 100  | x  | x  | x  | x  | x  | x  | x  |
| Derivation of themes                                                         | 100  | x  | x  | x  | x  | x  | x  | x  |
| Use of software                                                              | 100  | x  | x  | x  | x  | x  | x  | x  |
| Participant checking (did the participants provide feedback on the findings) | 85.7 | -  | x  | x  | x  | x  | x  | x  |
| <b>Reporting</b>                                                             |      |    |    |    |    |    |    |    |
| Quotations presented                                                         | 42.9 | x  | x  | x  | -  | -  | -  | -  |
| Data and findings consistent                                                 | 100  | x  | x  | x  | x  | x  | x  | x  |
| Clarity of major themes                                                      | 100  | x  | x  | x  | x  | x  | x  | x  |
| Clarity of minor themes                                                      | 100  | x  | x  | x  | x  | x  | x  | x  |
| <b>Total score for all 7 studies</b>                                         |      | 21 | 29 | 28 | 26 | 23 | 25 | 22 |

<sup>a</sup> Here x indicates the study satisfied the criteria, and - indicates they study did not satisfied the criteria. The average score across all 7 studies was 24.9, and the range was 21 – 29.
